# Supplementary material for: What are the constraints and opportunities for HIVST scale-up in Africa? Evidence from Kenya, Malawi and South Africa
Source: PubMed Central journal article supplement (PMC4369555; doi:10.7448/ias.18.1.19445), 2015-03-20
Supplement: JIAS-18-19445-s001.pdf [file JIAS-18-19445-s001.pdf]

**Evaluation of operational characteristics of late stage prototypes of HIV rapid tests  
Interview Guide for Key Stakeholders**

**Definition key stakeholder:** government officials involved in HIV control/MOH, NGOs, advocacy groups and social marketing groups, donors, national and international level procurement agencies, academic researchers, hospital directors.

*OBTAIN INFORMED CONSENT*

TOPICS FOR DISCUSSION

**General information**

1. What is your professional designation?
2. What is your role in HIV control and/or management?
3. How long have you been working in HIV control and/or management?

**Population and Access**

A. *Stakeholder Group: Policymaker, MOH*

1. Do you think your government/ministry will be interested in introducing an HIV rapid diagnostic test designed for self-testing? **If yes, answer 1b. If no, skip 1b and answer 1c.**
  - 1b. If yes, why do you think your government/ministry will be interested in introducing an HIV rapid diagnostic test designed for self-testing? **(Skip 1c)**
  - 1c. If no, why do you think your government/ministry will not be interested in introducing an HIV rapid diagnostic test designed for self-testing?

PROBE:

Why or why not do you think a country should scale-up HIV self-testing?

How ready do you think this country is for national, regional or district scale-up of HIV self-testing?

What steps are needed before scale-up of HIV self-testing?

Is there a need for HIV self-testing when there are other existing models of HIV testing that are under-utilized or poorly resourced? What would be reasons for using a new strategy?

2. What would be the most appropriate ways of distributing such an HIV self-test?  
What do you think would be best setting: Community or facility?
3. How do you think people would access an HIV self-testing kit?

4. Are there specific population/groups that you believe would most likely use an HIV self-test in your country? If so, please name the population/groups most likely to use an HIV self-testing test/device in your country?
5. How would the government access these population/groups for HIV self-testing?
6. We are interested in inviting people from these population/groups to try some HIV self-test prototypes. How do you think we could access these population/groups?
7. Who do you think should pay for these HIV self-test kits device in your country?
  - 7.1 Would the government be willing to pay? If so, what would you estimate to be an acceptable price for the HIV self-test?
  - 7.2 Is direct user procurement reasonable?
8. What benefits do you see to the introduction of an HIV self-test?  
 PROBE:  
 What do you think would influence the adoption of HIV self-testing?  
 Would WHO guidance and frameworks on HIV testing be helpful?
9. What challenges do you foresee with the introduction of an HIV self-test?  
 PROBE:  
 Do you think there are potential harms? If yes, do you think the potential risks outweigh the benefits of introducing HIV self-tests?  
 Which different interest groups should be included in this debate on the challenges and benefits of introducing HIV self-tests?  
 How do you think laboratory and other professional groups will react to the introduction of HIV self-tests?  
  
 What do you think consent means in the context of HIV self-testing? What about autonomy?  
  
 What are your suggestions on the dissemination of the results of this study especially usability of HIV self-test features/characteristics? How should the results be reported/disseminated so they can be used in decision making process on HIV self-testing in this country?

*B. Stakeholder Group: Procurement/Distribution*

1. How interested would your group be in an HIV rapid diagnostic test that is designed to enable HIV self-testing?

Please explain why/why not?

PROBE:

Why or why not do you think a country should scale-up HIV self-testing?

How ready do you think this country is for national, regional or district scale-up of HIV self-testing?

What steps are needed before scale-up of HIV self-testing?

Is there a need for self-testing when there are other existing models of HIV self-testing that are under-utilized or poorly resourced? What would be reasons for using a new strategy?

2. Who do you think would be the typical user/beneficiary of an HIV self-test? Are there specific groups who would benefit most? If so, who?
3. What would be the most appropriate ways of distributing such an HIV self-test? What would be best setting: Community or facility?
4. How do you think people would access an HIV self-testing kit?
5. What do you think is the best way to access these population/groups for HIV self-testing?
6. We are interested in inviting people from these population/groups to try out some HIV self-test prototypes. How do you think we could access these population/groups?
7. Who do you suggest should pay for these HIV self-test kits in your country?  
7.1 Is direct user procurement reasonable?
8. What benefits do you see to the introduction of an HIV self-test?  
PROBE:  
What do you think would influence the adoption of HIV self-testing?  
Would WHO guidance and frameworks on HIV testing be helpful?
9. What challenges do you foresee with the introduction of an HIV self-test?  
PROBE:  
What do you think will be reaction of lab and regulatory frameworks?

*C. Stakeholder Group: Advocate for Community and vulnerable patient group*

1. How interested would your beneficiary population/groups be in an HIV rapid diagnostic test that is designed to enable HIV self-testing?

Please explain why/why not?

PROBE:

Why or why not do you think a country should scale-up HIV self-testing?

How ready do you think this country is for national, regional or district scale-up of HIV self-testing?

What steps are needed before scale-up of HIV self-testing?

Is there a need for HIV self-testing when there are other existing models of HIV testing that are under-utilized or poorly resourced?

What would be reasons for using a new strategy?

2. Would an HIV self-test improve access to people who are under-diagnosed for social stigma reasons? Please provide reasons for your response.
3. Are there specific population/groups that you believe would be most likely to use an HIV self-test in your country? If so, please define the population/groups most likely to use an HIV self-testing test/device in your country?

4. What would be the most appropriate ways of distributing these HIV self-test kits?  
What would be best setting: Community or facility?
5. How do you think people would access an HIV self-test?
6. What do you think is the best way to access these population/groups for HIV self-testing?
7. We are interested in inviting people from these population/groups to try out some HIV self-test prototypes. How do you think we could access these population/groups?
8. Who do you suggest should pay for these HIV self-test kits in your country?  
8.1. Is direct user procurement reasonable?
9. What benefits do you see to the introduction of an HIV self-test?  
PROBE:  
What do you think would influence the adoption of HIV self-testing?  
Would WHO guidance and frameworks on HIV self-testing be helpful?
7. What challenges do you foresee with the introduction of an HIV self-test?  
PROBE:  
Which different interest groups should be included in the debate on the challenges and benefits of introducing HIV self-tests?  
  
How do you think laboratory and other professional groups will react to the introduction of HIV self-tests?  
  
What do you think consent means in the context of self-testing? What about autonomy?  
  
What are your suggestions on the dissemination of the results of this study especially usability of HIV self-test features/characteristics? How should the results be reported/disseminated so they can be used in decision making process on HIV self-testing in this country?

*D. Stakeholder Group: Academic Researcher*

1. Are there specific population/groups that you believe would be most likely to use an HIV self-test in your country? If so, please define the population/groups most likely to use an HIV self-testing test/device in your country?

PROBE:

Why or why not do you think a country should scale-up HIV self-testing?

How ready do you think this country is for national, regional or district scale-up of HIV self-testing?

What steps are needed before scale-up of HIV self-testing?

Is there a need for self-testing when there are other existing models of HIV self-testing that are under-utilized or poorly resourced?

What would be reasons for using a new strategy?

2. What would be the most appropriate ways of distributing the HIV self-test kits?  
What would be best setting: Community or facility?
  3. How do you think people would access an HIV self-test?
  4. What do you think is the best way to access these population/groups for HIV self-testing?
  5. We are interested in inviting people from these population/groups to try out some HIV self-test prototypes. How do you think we could access these population/groups?
  6. Who do you suggest should pay for these HIV self-test kits in your country?
    - Is direct user procurement reasonable?
  7. What benefits do you foresee with the introduction of an HIV self-test?  
 PROBE:  
 What do you think would influence the adoption of HIV self-testing?  
 Would WHO guidance and frameworks on HIV self-testing be helpful?
  8. What challenges do you foresee with the introduction of an HIV self-test?  
 PROBE:  
 Which different interest groups should be included in the debate on the challenges of introducing HIV self-tests?  
 How do you think laboratory and other professional groups will react to the introduction of HIV self-tests?  
  
 What do you think consent means in the context of HIV self-testing? What about autonomy?  
  
 What are your suggestions on the dissemination of the results of this study especially usability of test features/characteristics? How should the results be reported/disseminated so they can be used in decisions about HIV self-testing in this country?
- E. Stakeholder Group: Hospital directors/Health care provider (?)*
1. How interested are you in an HIV rapid diagnostic test that is designed to enable HIV self-testing?  
Please explain why/why not?  
 PROBE:  
 Why or why not do you think a country should scale-up HIV self-testing?  
 How ready do you think this country is for national, regional or district scale-up of HIV self-testing?  
 What steps are needed before scale-up of HIV self-testing?  
  
 Is there a need for HIV self-testing when there are other existing models of HIV testing that are under-utilized or poorly resourced?  
 What would be reasons for using a new strategy?

2. How would you recommend that patients interact with the health care system in the event of an HIV positive self-test result?
3. In your view, is there a “typical” patient for an HIV self-test? If so, how would you describe that patient?
4. What would be the most appropriate ways of distributing HIV self-test kits?  
What would be best setting: Community or facility?
5. How do you think people would access an HIV self-test?
6. We are interested in inviting people from these population/groups to try out some HIV self-test prototypes. How do you think we could access these population/groups?
7. How best can we access these population/groups for HIV self-testing? Or for the usability research?
8. Who do you think should pay for an HIV self-test in your country? Is direct user procurement reasonable?
9. What challenges do you foresee with the introduction of an HIV self-test?  
**PROBE:**  
 Which different interest groups should be included in the debate on the challenges of introducing HIV self-tests?  
 How do you think laboratory and other professional groups will react to the introduction of HIV self-tests?  
  
 What do you think consent means in the context of HIV self-testing? What about autonomy?  
  
 What are your suggestions on the dissemination of the results of this study especially usability of test features/characteristics? How should the results be reported/disseminated so they can be used in decisions about HIV self-testing in this country?

**QUESTION FOR ALL STAKEHOLDERS:**

**Test characteristics**

1. What do you think are most challenging technical/operational aspects of conducting an HIV self-test?
2. In your opinion, what characteristics of a HIV test are most important for selecting a test for HIV self-testing?

**Probe on the following:**

- Test performance e.g., sensitivity, specificity, detection of specific antibodies (HIV-1, HIV-2)
- Cost
- Acceptability – please specify what? Size e.g., discreet so fits into pocket?
- Sample – blood or oral/saliva
- Number of steps, integrated steps
- Instructions for using – pictorial, written

- Time to results
- Ease of use, safety, need for training, shelf life
- Other...

**Linkage to care**

1. Effective linkage to care is often cited as a barrier to HIV self-testing. How do you think linkage to care could best be achieved with HIV self-testing?

**Referrals**

1. Can you please recommend two additional contacts that you feel we should interview for this topic? Name organization, contact information?

CONFIDENTIAL
